# Supplementary material
Source: PubMed Central journal article supplement (PMC3461408)
Supplement: NIHMS49196-supplement-1.pdf [file NIHMS49196-supplement-1.pdf]

## Supplementary Information

### **Mosaic Overgrowth with Fibroadipose Hyperplasia is Caused by Somatic Activating Mutations in**

#### **PIK3CA**

Marjorie J Lindhurst<sup>\*</sup>, Victoria ER Parker<sup>\*</sup>, Felicity Payne, Julie C Sapp, Simon Rudge, Julie Harris, Alison M Witkowski, Qifeng Zhang, Matthijs P Groeneveld, Carol E Scott, Allan Daly, Susan M Huson, Laura L Tosi, Michael L Cunningham, Thomas N Darling, Joseph Geer, Zoran Gucev, V. Reid Sutton, Christos Tziotzios, Adrian K Dixon, Timothy Helliwell, Stephen O'Rahilly, David B Savage, Michael JO Wakelam, Inês Barroso<sup>#</sup>, Leslie G Biesecker<sup>#</sup>, Robert K Semple<sup>#</sup>

# co-corresponding

\*These authors contributed equally to this work.

Marjorie J Lindhurst & Victoria ER Parker

Correspondence:

Dr. Leslie G. Biesecker, NIH – National Human Genome Research Institute, 49 Convent Drive Room 4A56, Bethesda, MD 20892

T: 301-402-2041

F: 301-402-2170

E: [leslieb@helix.nih.gov](mailto:leslieb@helix.nih.gov)

OR

Dr. Robert K. Semple, University of Cambridge Metabolic Research Laboratories, Institute of Metabolic Science, Box 289, Addenbrooke's Hospital, Cambridge CB2 0QQ, UK.

T: +44 1223 769 035

F: +44 1223 330 598

E: [rks16@cam.ac.uk](mailto:rks16@cam.ac.uk)

OR

Dr. Inês Barroso, The Wellcome Trust Sanger Institute, Wellcome Trust Genome Campus, Cambridge,  
CB10 1SA, UK.

T: +44 (0)1223 496 928

F: +44 (0)1223 494 919

E: [ib1@sanger.ac.uk](mailto:ib1@sanger.ac.uk)

### **Supplementary Tables**

Supplementary Table 1: Summary of *PIK3CA* mutation burdens in tissues and cells tested.

Supplementary Table 2: Primary antibodies used for immunoblotting.

### **Supplementary Figures**

Supplementary Figure 1: Summary of exome sequencing and genetic follow up studies in patient C1.

Supplementary Figure 2: BsaBI digestion of mutation spanning *PIK3CA* amplicon in arm and leg cells from patient C1.

### **Supplementary Note: Clinical Data**

Description of recruitment and phenotyping.

**Supplementary Table 1: Summary of *PIK3CA* Mutation Burdens Tissues and Cells Tested**

| Patient          | Anatomical Source <sup>1</sup>                  | Tissue Mutation level (%) <sup>2</sup> | Cultured cells Mutation level (%) <sup>3</sup> |
|------------------|-------------------------------------------------|----------------------------------------|------------------------------------------------|
| C1               | Adipose tissue – left leg                       | 39                                     | -                                              |
| Leu <sup>4</sup> | Muscle <sup>5</sup> – left leg                  | 33                                     | -                                              |
|                  | Fibrous tissue – left leg                       | 32                                     | -                                              |
|                  | Skin – left leg                                 | 24                                     | 50                                             |
|                  | Bone – left leg                                 | 8                                      | -                                              |
|                  | Skin – left arm                                 | -                                      | 0                                              |
|                  | Blood                                           | 0                                      | -                                              |
| C2               | Right arm                                       | 49                                     | -                                              |
| Leu              | Right thumb                                     | 18                                     | -                                              |
| N7               | Articular cartilage - left foot                 | -                                      | 32-34                                          |
| Arg              | Adipose tissue - left foot                      | -                                      | 33                                             |
|                  | Bone - left foot                                | -                                      | 31-35                                          |
|                  | Skin - left foot                                | -                                      | 30-34                                          |
|                  | Muscle - left foot                              | -                                      | 12-19                                          |
|                  | Deep tissue - left foot                         | -                                      | 2-7                                            |
|                  | Blood                                           | 0                                      | -                                              |
| N45              | Skin - ankle                                    | -                                      | <1-2                                           |
| Arg              | Blood                                           | 0                                      | -                                              |
| N68              | Skin - left second finger ulnar surface         | -                                      | <1-5                                           |
| Arg              | Blood                                           | 0                                      | -                                              |
| N99              | Growth plate - left second toe middle phalanx   | 22                                     | -                                              |
| Arg              | Growth plate - left third toe proximal phalanx  | 27                                     | -                                              |
|                  | Growth plate - left third toe middle phalanx    | 9                                      | -                                              |
|                  | Growth plate - left second toe proximal phalanx | 31                                     | -                                              |
|                  | Growth plate - left second toe distal phalanx   | 25                                     | -                                              |
|                  | Growth plate - left third toe middle phalanx    | 14                                     | -                                              |
|                  | Skin - webbing between second and third toes    | -                                      | 29-32                                          |
|                  | Blood                                           | 0                                      | -                                              |
| N104             | Skin - left hand                                | -                                      | 1-3                                            |
| Arg              | Blood                                           | 0                                      | -                                              |
| N108             | Skin – left leg                                 | 5                                      | -                                              |
| Leu              | Adipose tissue – left leg                       | 4                                      | -                                              |
|                  | Blood                                           | 0                                      | -                                              |
| N109             | Skin – dorsal left foot                         | 12                                     | 30-31                                          |
| Arg              | Blood                                           | 0                                      | -                                              |
| N110             | Skin - medial tip of second left toe            | 7                                      | 27                                             |
| Arg              | Blood                                           | 0                                      | -                                              |

<sup>1</sup>Description of the source tissue for mutation analyses.

<sup>2</sup>Percentage *PIK3CA* c.3140A>T (p.His1047Leu) as determined by BsaBI or MseI restriction assays or c.3140A>G (p.His1047Arg) as determined by BmgBI restriction assay in DNA extracted directly from tissue.

<sup>3</sup>Percentage *PIK3CA* c.3140A>T or c.3140A>G as determined by BsaBI or BmgBI assays respectively, in DNA extracted from cells cultured from tissue specimens. Range indicates mutation levels if multiple DNA extractions were performed.

<sup>4</sup>Leu indicates p.His1047Leu mutation and Arg indicates p.His1047Arg mutation.

<sup>5</sup>Macroscopic appearance of muscle but heavy infiltration with adipocytes microscopically.

**Supplementary Table 2: Primers and enzymes used for custom restriction assay**

| <b>Codon 1047 status</b> | <b>Forward Primer</b>            | <b>Reverse Primer</b> | <b>Enzyme</b>                     |
|--------------------------|----------------------------------|-----------------------|-----------------------------------|
| <b>Wild type</b>         | (6-FAM)-<br>GGTCTTTCCTGCTGAGAGT  | TGAGCAAGAGGCTTTGGAGT  | BsaBI<br>(Fermentas)              |
| <b>p.His1047Arg</b>      | (6-FAM)-<br>CTGAGCAAGAGGCTTTGGAG | AGTGTGGAATCCAGAGTGAG  | BmgBI (New<br>England<br>Biolabs) |
| <b>p.His1047Leu</b>      | (6-FAM)-<br>TGATGCTTGGCTCTGGAATG | TTTGTGTCCAGCCACCATTA  | MseI (New<br>England<br>Biolabs)  |

**Supplementary Table 3: Primary antibodies used for immunoblotting**

| <b>Primary antibody</b> | <b>Manufacturer/ cat#</b>        |
|-------------------------|----------------------------------|
| pAKT (Ser474)           | Cell Signaling Technology/4060   |
| pAKT (Thr309)           | Cell Signaling Technology / 4056 |
| Total AKT               | Cell Signaling Technology / 2920 |
| pGSK3                   | Millipore/ 05-413                |
| p70 S6 kinase (Thr389)  | Cell Signaling Technology / 9234 |
| pERK1/2                 | Cell Signaling Technology / 4370 |
| Calnexin                | Cell Signaling Technology /2679  |

**Supplementary Figure 1: Summary of Exome Sequencing and Genetic Follow Up Studies in Patient C1.**

**A.** Forty-five novel variants were called as being exclusive to leg cells by whole exome sequencing. **B.** Further Sanger sequencing of all variants called as being leg-specific identified 26 false positive calls (i.e. the mutation was not found in leg DNA) and 1 false negative call in the arm (i.e. the mutation was found in both leg and arm DNA). DNA was then extracted from early passage fibroblasts obtained from a fresh cutaneous biopsy and this ruled out a further 16 mutations, leaving 2 candidate pathogenic mutations.

A

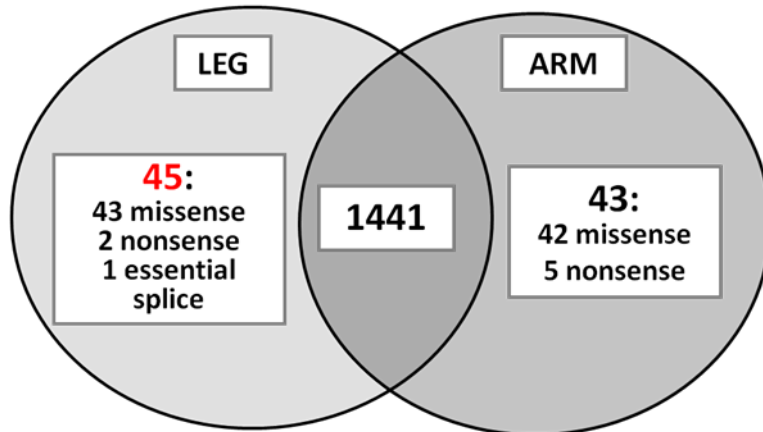

B

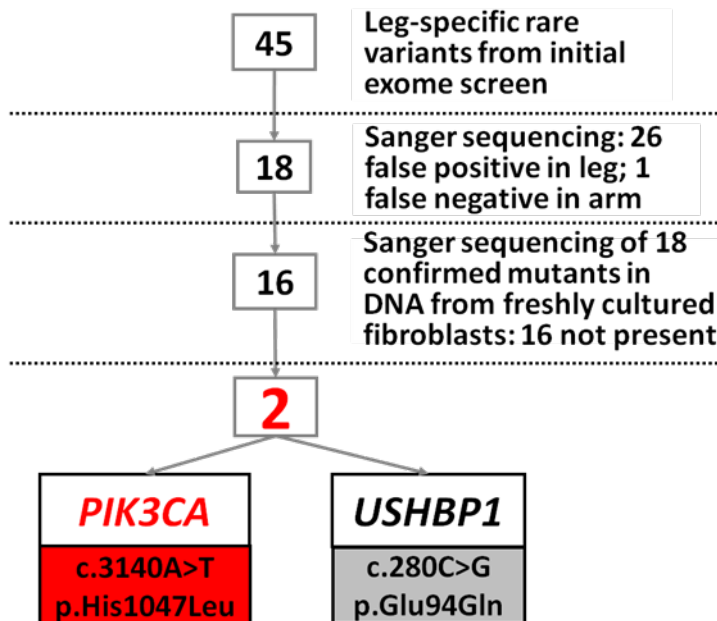

**Supplementary Figure 2:** BsaBI digestion of mutation spanning *PIK3CA* amplicon in arm and leg cells from patient C1. WT: wild type, M: mutant. See Supplementary Table 2 for primers and enzymes used in this assay.

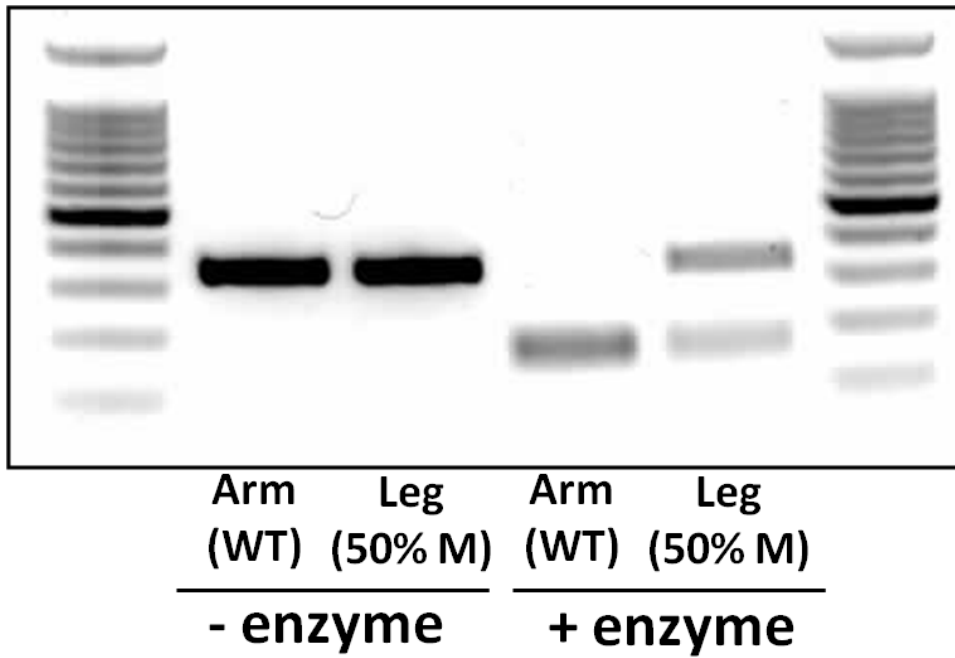

### **Supplementary Note: Clinical Data**

The subjects were recruited through referring clinicians for their unusual pattern of overgrowth to join ongoing research studies of LGB & RKS. These research studies were reviewed and approved by the appropriate IRB/Ethics committee and the participants provided informed consent or assent, as stipulated by the review committees. The clinical evaluations of the patient varied according to their manifestations. These evaluations included physical examination and imaging studies including plain radiography, magnetic resonance imaging, and other techniques. Samples were collected from affected and unaffected areas of the participants, most commonly by punch biopsy.
